# Supplementary material for: Targeting the glucocorticoid receptor signature gene Mono Amine Oxidase-A enhances the efficacy of chemo- and anti-androgen therapy in advanced prostate cancer
Source: PubMed Central journal article supplement (PMC8084733; doi:10.1038/s41388-021-01754-0), 2021-04-01

Figure S2

MAO-A antibody specificity testing for Western blot and IHC

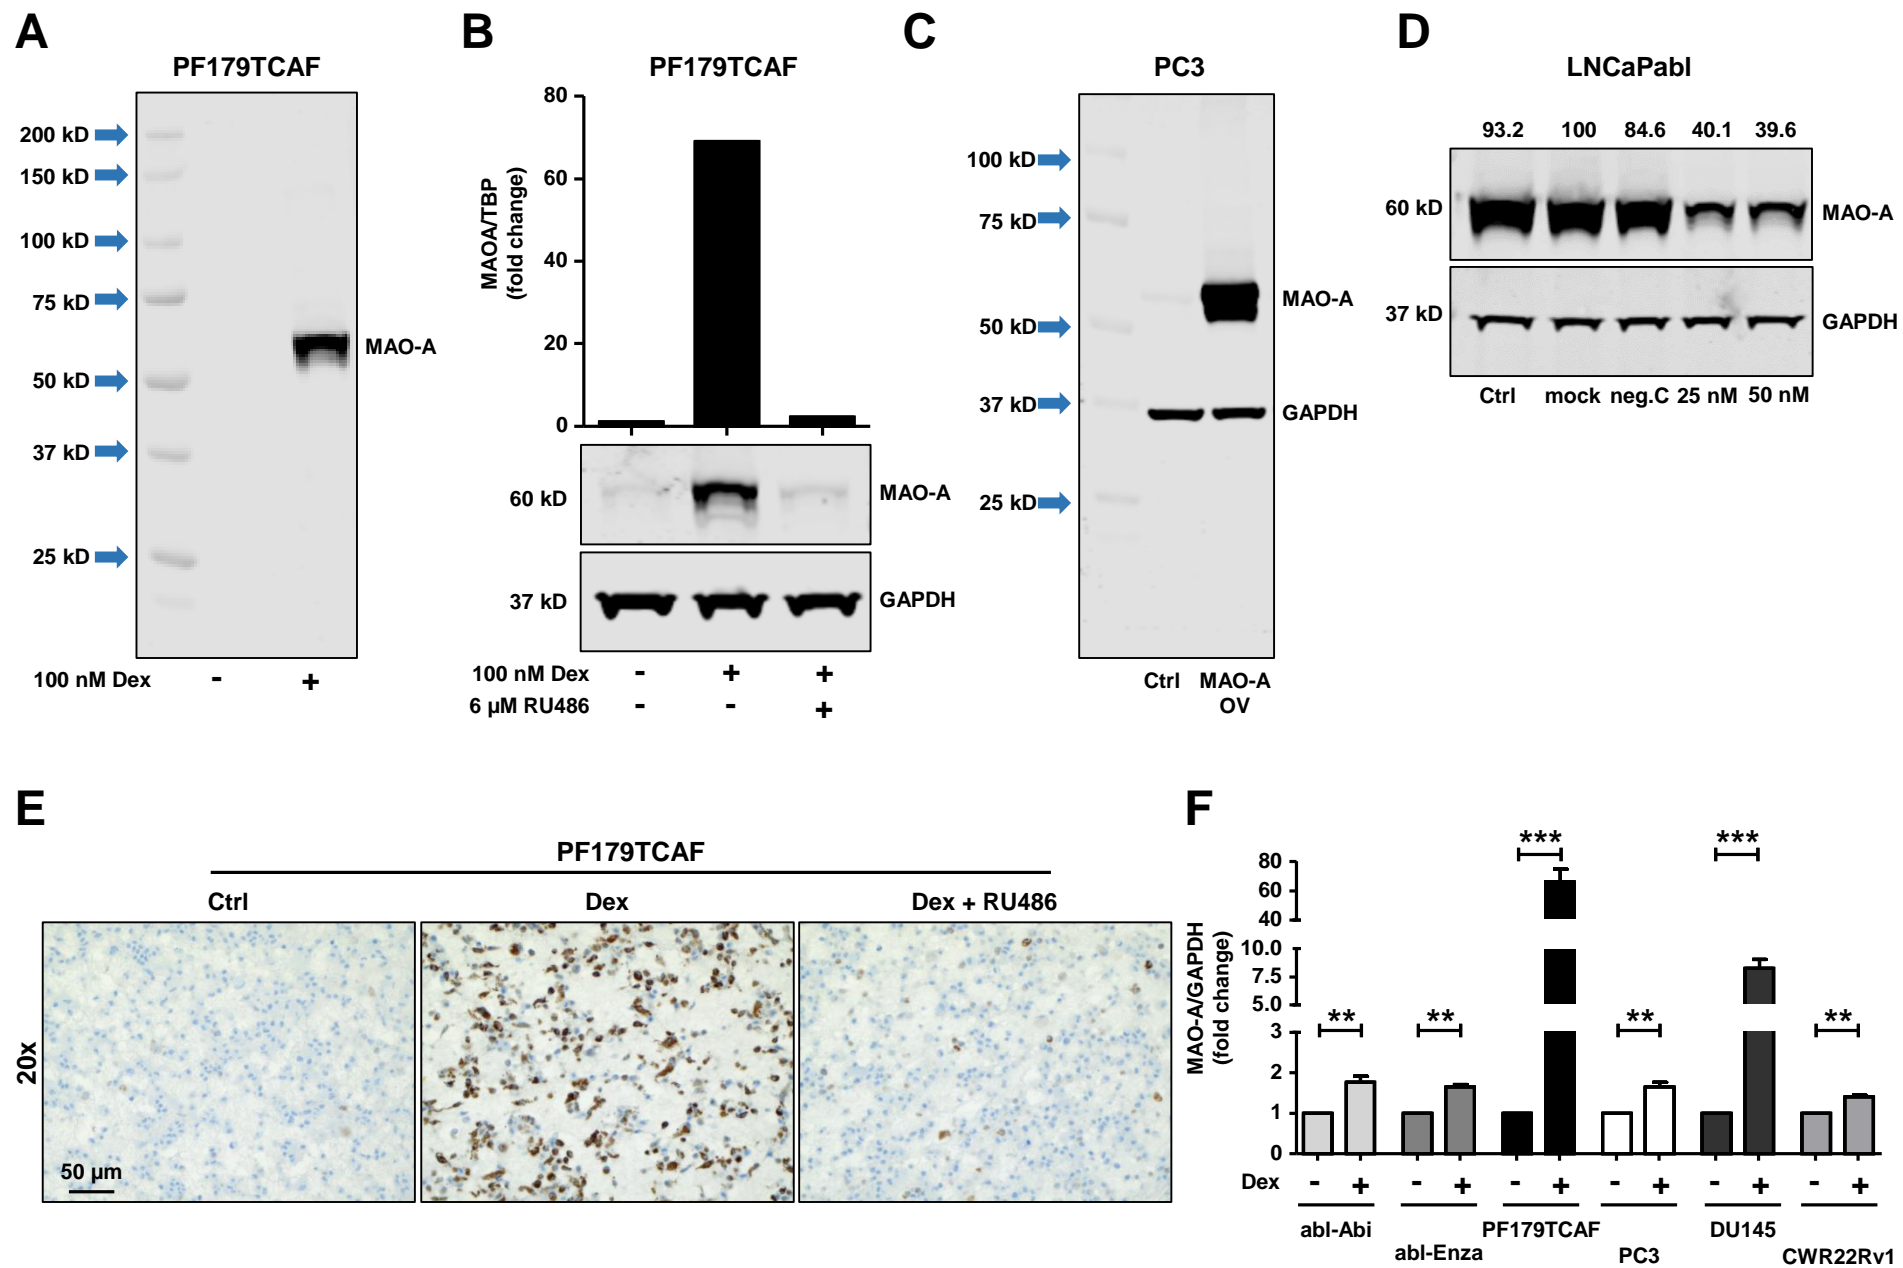

Supplement: 41388_2021_1754_MOESM2_ESM.pdf [file 41388_2021_1754_MOESM2_ESM.pdf]
