# Supplementary material for: Targeting the glucocorticoid receptor signature gene Mono Amine Oxidase-A enhances the efficacy of chemo- and anti-androgen therapy in advanced prostate cancer
Source: PubMed Central journal article supplement (PMC8084733; doi:10.1038/s41388-021-01754-0), 2021-04-01

**Figure S4**

**A**

**EMT marker mRNA screen**  
(MAO-A overexpression in PC3 and DU145 cells)

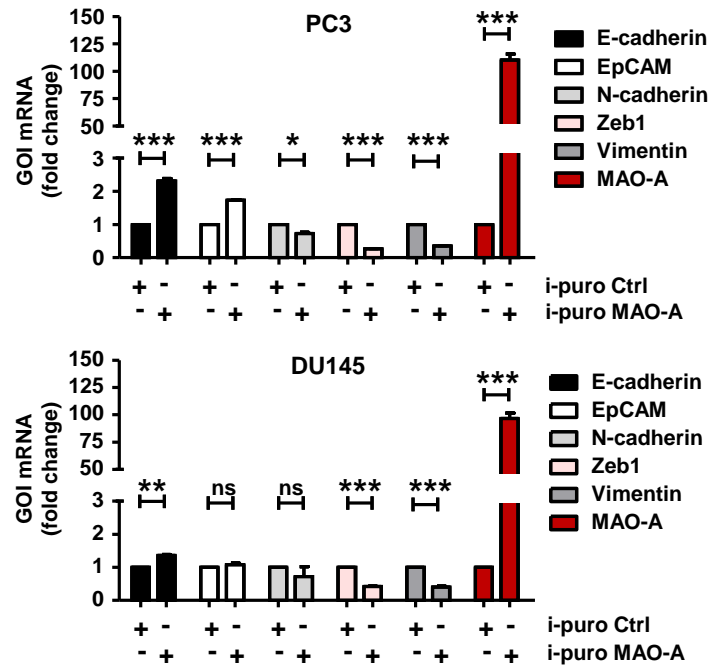

**B**

**EMT marker protein expression**  
(MAO-A overexpression in PC3 and DU145 cells)

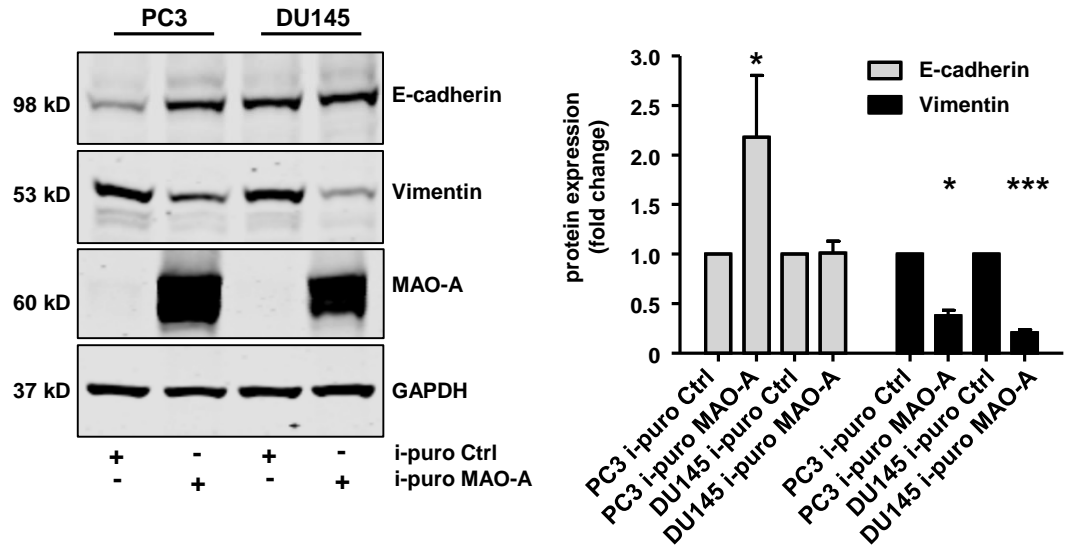

**C**

**EMT marker mRNA screen**  
(MAO-A knockdown in PC3 and DU145 cells)

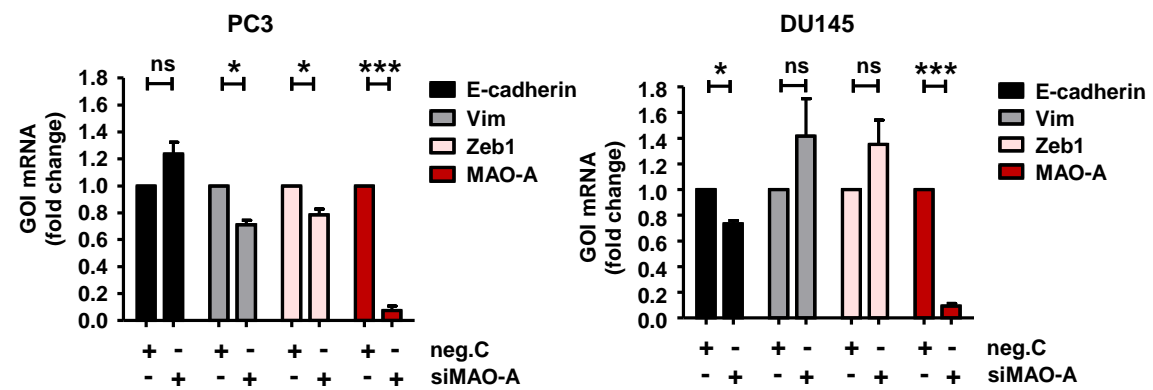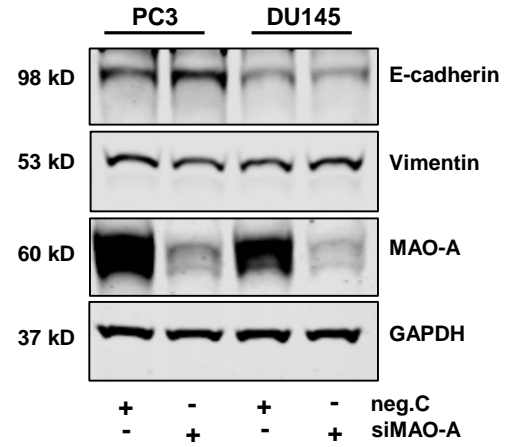

Supplement: 41388_2021_1754_MOESM4_ESM.pdf [file 41388_2021_1754_MOESM4_ESM.pdf]
