# Supplementary material for: Targeting the glucocorticoid receptor signature gene Mono Amine Oxidase-A enhances the efficacy of chemo- and anti-androgen therapy in advanced prostate cancer
Source: PubMed Central journal article supplement (PMC8084733; doi:10.1038/s41388-021-01754-0), 2021-04-01
Supplement: 41388_2021_1754_MOESM6_ESM.pdf [file 41388_2021_1754_MOESM6_ESM.pdf]

A

## Single cell RNAseq screen for basal MAO-A mRNA expression

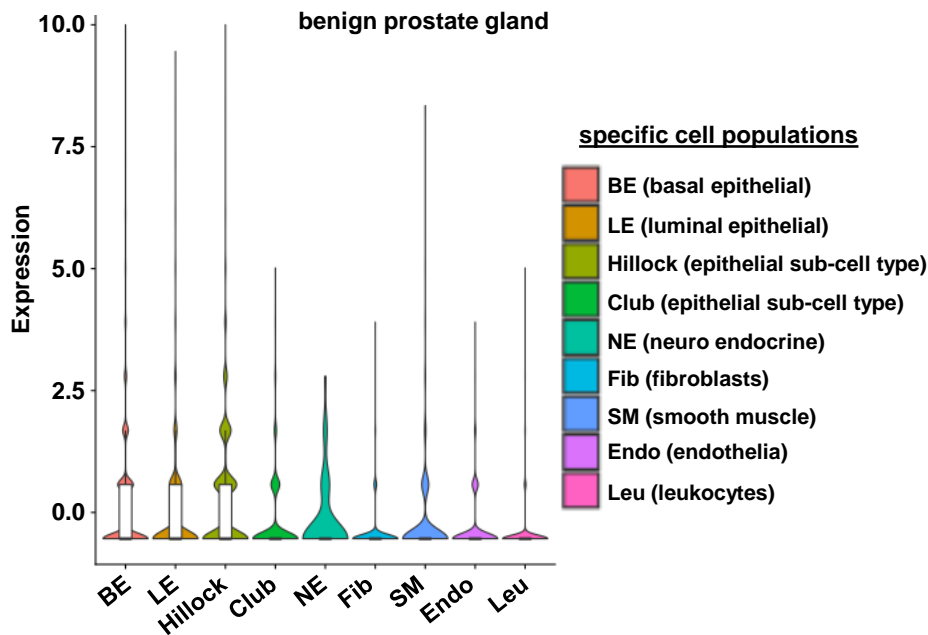

B

## Oncomine data base screen

MAO-A expression  
(all listed tumor entities)

| CA vs. BE<br>(MAO-A expression) | up-<br>regulated | down-<br>regulated |
|---------------------------------|------------------|--------------------|
| Bladder Cancer                  | 1*(12)           | 1*(12)             |
| Brain/CNS Cancer                | 1*(29)           | 2*(29)             |
| Breast Cancer                   | ---              | 30*(53)            |
| Cervical Cancer                 | 1*(7)            | ---                |
| Colorectal Cancer               | ---              | 22*(35)            |
| Esophageal Cancer               | ---              | 3*(11)             |
| Gastric Cancer                  | ---              | 7*(23)             |
| Head/Neck Cancer                | 1*(31)           | 3*(31)             |
| Kidney Cancer                   | ---              | 6*(20)             |
| Leukemia                        | 3*(29)           | ---                |
| Liver Cancer                    | ---              | 6*(10)             |
| Lung Cancer                     | ---              | 18*(21)            |
| Lymphoma                        | 2*(35)           | 1*(35)             |
| Melanoma                        | ---              | 3*(5)              |
| Myeloma                         | ---              | ---                |
| Other Cancer                    | 1*(32)           | 6*(32)             |
| Ovarian Cancer                  | ---              | 6*(13)             |
| Pancreatic Cancer               | ---              | ---                |
| Prostate Cancer                 | 4*(19)           | ---                |
| Sarcoma                         | ---              | 12*(20)            |
| significant analyses            | 14               | 126                |
| included analyses               | 457              |                    |

\* n significant analyses (n total analyses)

C

## significantly altered MAO-A PCa Oncomine datasets

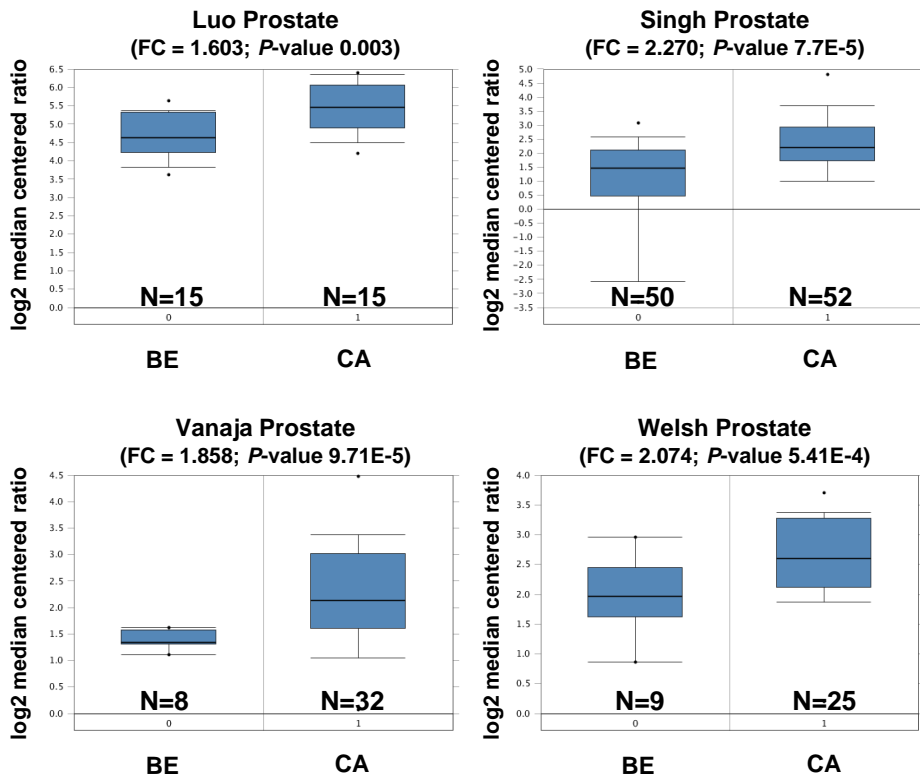Thresholds:  $P$ -value: 0.01, Fold change: 1.5, Gene rank: Top10%, data type all
