# Supplementary material for: Targeting the glucocorticoid receptor signature gene Mono Amine Oxidase-A enhances the efficacy of chemo- and anti-androgen therapy in advanced prostate cancer
Source: PubMed Central journal article supplement (PMC8084733; doi:10.1038/s41388-021-01754-0), 2021-04-01

**A** IHC screen for general basal MAO-A protein expression

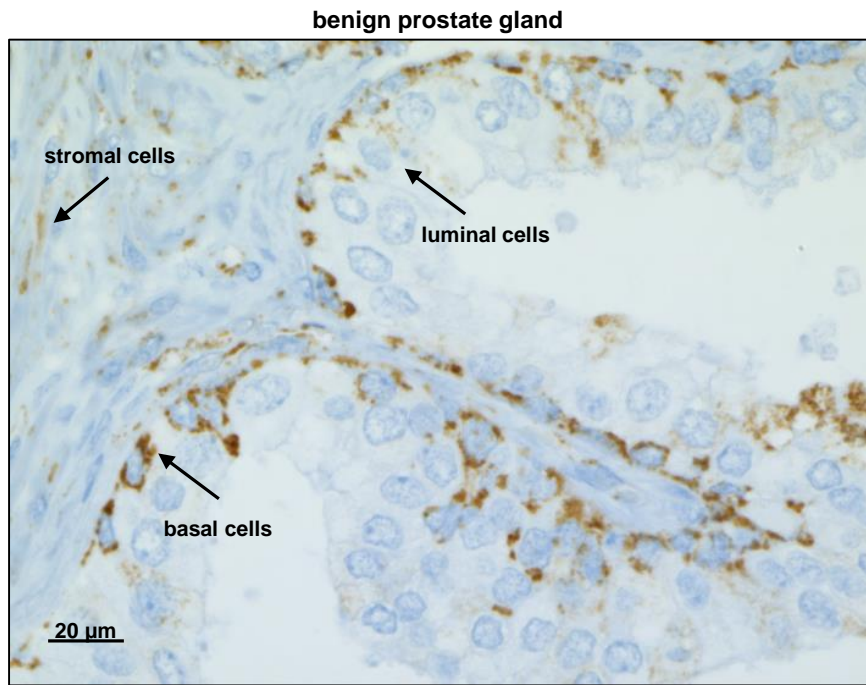

**C** IHC cell line screen for general basal MAO-A protein expression

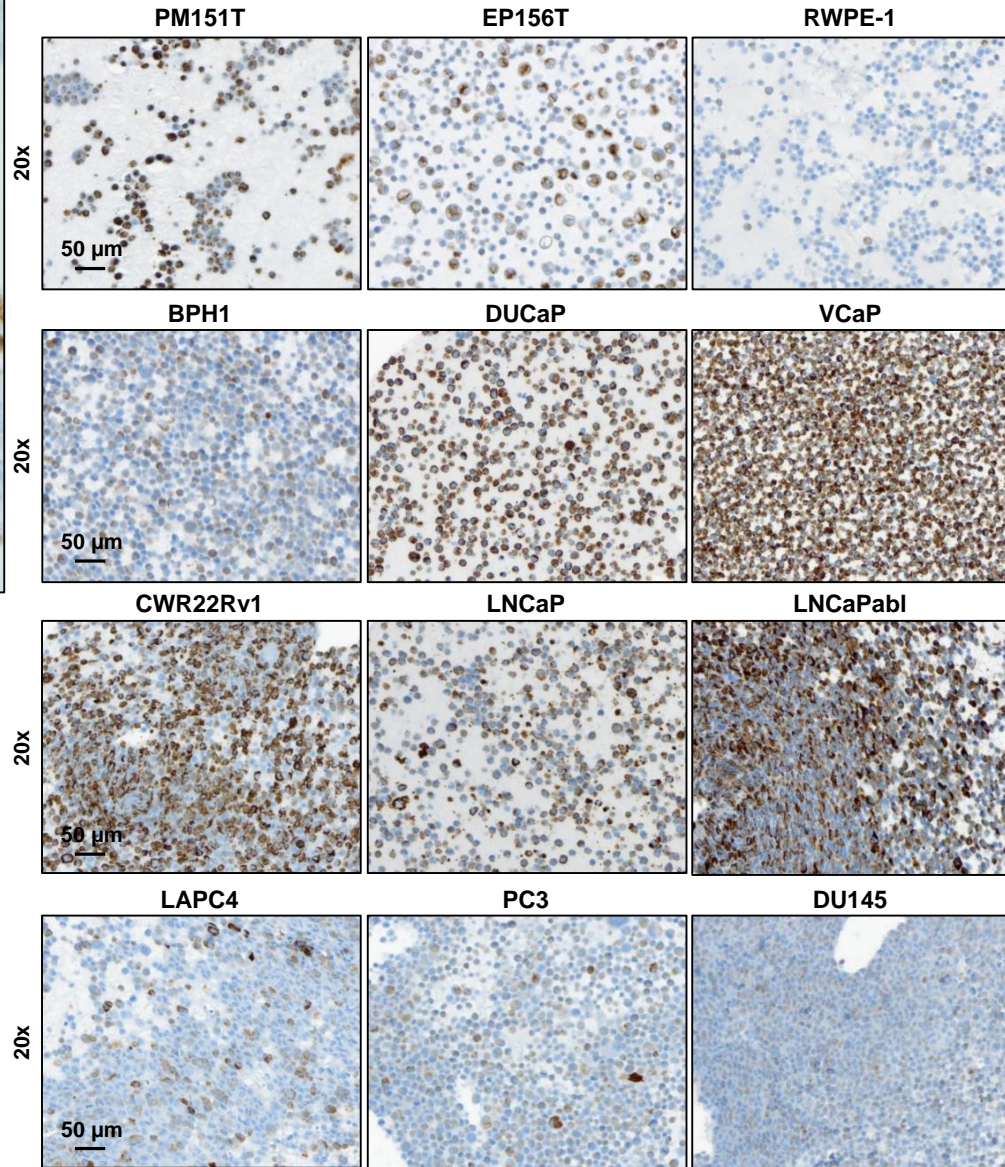

**B** cell line screen MAO-A mRNA/protein

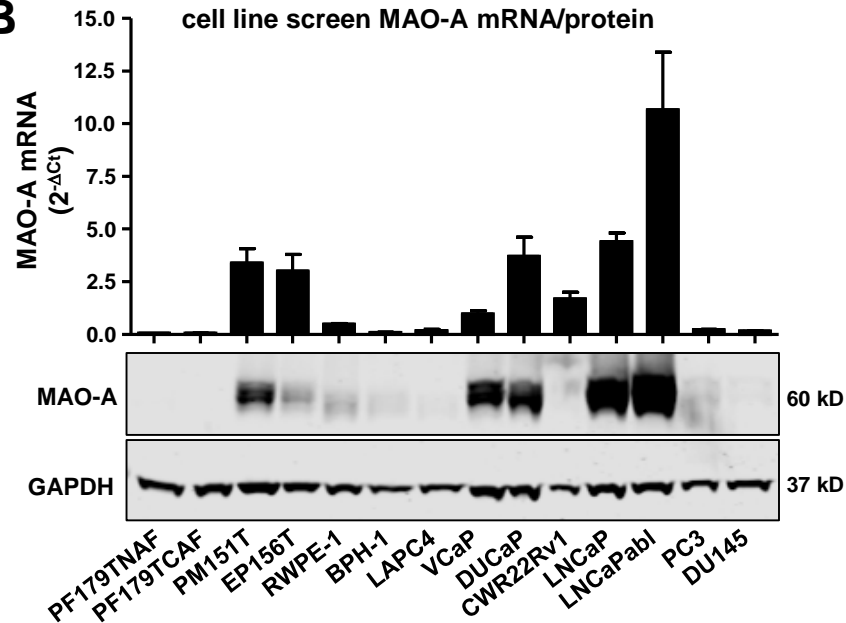

Supplement: 41388_2021_1754_MOESM7_ESM.pdf [file 41388_2021_1754_MOESM7_ESM.pdf]
