# Supplementary material for: Targeting the glucocorticoid receptor signature gene Mono Amine Oxidase-A enhances the efficacy of chemo- and anti-androgen therapy in advanced prostate cancer
Source: PubMed Central journal article supplement (PMC8084733; doi:10.1038/s41388-021-01754-0), 2021-04-01
Supplement: 41388_2021_1754_MOESM11_ESM.pdf [file 41388_2021_1754_MOESM11_ESM.pdf]

**Additional File 2 Table S1:**

stromal and epithelial data set comparisons. Significantly up-regulated genes (>1.5 FC FDR <0.1) between different datasets. These data are the basis for Figure 1 E, F

| 4      | 23       | 1    | 78      | 20        | 159      | 9        |
|--------|----------|------|---------|-----------|----------|----------|
| FKBP5  | SGK1     | PER1 | SAA2    | PGC       | TUBA3C   | PTGER4   |
| MAOA   | KLK4     |      | SAA1    | FAXDC2    | TUBA3E   | CRISPLD2 |
| ERRFI1 | SPSB1    |      | IRS2    | COLCA1    | PGLYRP2  | ELL2     |
| KLF9   | HTR3A    |      | CXCL8   | MYBPC1    | C5orf4   | EEF2K    |
|        | SCNN1G   |      | FLVCR2  | KLK2      | SLC25A18 | NFKBIA   |
|        | C19orf48 |      | METTL7A | MAP1B     | SNAI2    | TSC22D3  |
|        | RGS2     |      | CPM     | CST1      | EMP1     | FOXO3    |
|        | TUBA3D   |      | SLC7A2  | IL6R      | RASD1    | MT1X     |
|        | TMPRSS2  |      | AOX1    | FAM43A    | SLC45A3  | IFNGR1   |
|        | RHOU     |      | CXCL1   | DUSP4     | TFAP2A   |          |
|        | ETS2     |      | ADH1B   | IGF1R     | BIRC3    |          |
|        | MBOAT2   |      | IFI44L  | LCP1      | S100P    |          |
|        | NPC1     |      | ITGA10  | PLPP1     | GADD45B  |          |
|        | ZC3H12A  |      | FAM107A | TMPRSS11E | TRIM36   |          |
|        | STK39    |      | PTK2B   | BBS12     | CEBPD    |          |
|        | FAM105A  |      | GCNT1   | TMCC3     | KCNMA1   |          |
|        | FAM49A   |      | DUSP5   | AKAP5     | PSD      |          |
|        | CHKA     |      | PISD    | HSD17B11  | TRIM48   |          |
|        | HOMER2   |      | FAM167A | GALNT2    | KLF5     |          |
|        | FBXO38   |      | PXYLP1  | CFAP69    | KLF15    |          |
|        | PRKCD    |      | DNAJB4  |           | C9orf152 |          |
|        | TBC1D8   |      | PPME1   |           | DBC1     |          |
|        | TPM1     |      | LRRC16A |           | ALDH1A3  |          |
|        |          |      | SORT1   |           | HERC5    |          |
|        |          |      | ZBTB16  |           | SLC25A27 |          |
|        |          |      | TRNP1   |           | PPP1R1B  |          |
|        |          |      | FABP4   |           | GSG1     |          |
|        |          |      | PARM1   |           | ACTA2    |          |
|        |          |      | TCEAL4  |           | C11orf92 |          |
|        |          |      | PRKAG2  |           | PRR15L   |          |
|        |          |      | ABLIM3  |           | PMEPA1   |          |
|        |          |      | SLC44A1 |           | FHL2     |          |
|        |          |      | PKDCC   |           | PHLDA1   |          |
|        |          |      | ARMC8   |           | ADAMTSL4 |          |
|        |          |      | SLC7A8  |           | EDG7     |          |
|        |          |      | KRT10   |           | LEPREL1  |          |
|        |          |      | GGT5    |           | STX19    |          |

|  |  |          |          |
|--|--|----------|----------|
|  |  | CXCL6    | C7orf63  |
|  |  | CHCHD7   | AHNAK    |
|  |  | SP110    | RND3     |
|  |  | FPR1     | NKX3-1   |
|  |  | AGL      | MICAL2   |
|  |  | CLDN7    | KIAA0040 |
|  |  | C1QL1    | GREB1    |
|  |  | TCEAL3   | C17orf48 |
|  |  | ATOH8    | LPAR3    |
|  |  | ITGA5    | ZMIZ1    |
|  |  | DPY19L4  | PDE9A    |
|  |  | YEATS2   | F2RL1    |
|  |  | SLC16A12 | ABHD2    |
|  |  | RASL11B  | MIB1     |
|  |  | ELF1     | C1orf149 |
|  |  | TCAF2    | FLJ30428 |
|  |  | DIAPH2   | CA13     |
|  |  | ITPR1    | ECAT8    |
|  |  | GK5      | SPIC     |
|  |  | TCEAL1   | CRY2     |
|  |  | SLC26A6  | TSKU     |
|  |  | NID2     | KRT80    |
|  |  | SRPX2    | TSPYL2   |
|  |  | ALOX5AP  | HMOX2    |
|  |  | EPS8     | RAB3B    |
|  |  | ANXA4    | RHOB     |
|  |  | TCEAL6   | NEDD4L   |
|  |  | SSB      | HSD11B2  |
|  |  | ITPK1    | PPAP2A   |
|  |  | WBP5     | NDRG1    |
|  |  | AKAP13   | MEAF6    |
|  |  | FAM222B  | STEAP2   |
|  |  | TBC1D12  | SLC2A12  |
|  |  | TNIP1    | AGXT2L1  |
|  |  | ARRDC1   | KBTBD11  |
|  |  | GALNT15  | PCDH10   |
|  |  | PCYT2    | LIN7B    |
|  |  | MT1F     | GPR125   |
|  |  | MORF4L2  | ARG1     |
|  |  | PTPN1    | GHR      |
|  |  | ZHX3     | SLC31A2  |
|  |  |          | BRDT     |
|  |  |          | SPRYD5   |
|  |  |          | KCNRG    |
|  |  |          | TMEM164  |

|  |  |  |  |  |           |  |
|--|--|--|--|--|-----------|--|
|  |  |  |  |  | ABCC4     |  |
|  |  |  |  |  | C1orf116  |  |
|  |  |  |  |  | DDIT4     |  |
|  |  |  |  |  | HERC6     |  |
|  |  |  |  |  | PPFIBP1   |  |
|  |  |  |  |  | DOCK5     |  |
|  |  |  |  |  | PDCD11    |  |
|  |  |  |  |  | DNAJB5    |  |
|  |  |  |  |  | FRMD3     |  |
|  |  |  |  |  | TBC1D4    |  |
|  |  |  |  |  | KIF5C     |  |
|  |  |  |  |  | FLJ22795  |  |
|  |  |  |  |  | STAT3     |  |
|  |  |  |  |  | PER2      |  |
|  |  |  |  |  | C17orf58  |  |
|  |  |  |  |  | BCL6      |  |
|  |  |  |  |  | GADD45G   |  |
|  |  |  |  |  | CGNL1     |  |
|  |  |  |  |  | NRP1      |  |
|  |  |  |  |  | MTMR9     |  |
|  |  |  |  |  | SIPA1L2   |  |
|  |  |  |  |  | CA12      |  |
|  |  |  |  |  | C6orf85   |  |
|  |  |  |  |  | STEAP1    |  |
|  |  |  |  |  | ATAD2     |  |
|  |  |  |  |  | OFD1      |  |
|  |  |  |  |  | FRYL      |  |
|  |  |  |  |  | PACSIN2   |  |
|  |  |  |  |  | RRAS      |  |
|  |  |  |  |  | TCP10L    |  |
|  |  |  |  |  | AXUD1     |  |
|  |  |  |  |  | SH3BGR    |  |
|  |  |  |  |  | KIAA1370  |  |
|  |  |  |  |  | PLLP      |  |
|  |  |  |  |  | SOCS2     |  |
|  |  |  |  |  | KLF6      |  |
|  |  |  |  |  | RDH10     |  |
|  |  |  |  |  | ZBTB25    |  |
|  |  |  |  |  | RAB20     |  |
|  |  |  |  |  | CYR61     |  |
|  |  |  |  |  | MLPH      |  |
|  |  |  |  |  | LOC652968 |  |
|  |  |  |  |  | ZYX       |  |
|  |  |  |  |  | IL1R1     |  |
|  |  |  |  |  | ARHGAP28  |  |

|  |  |  |  |  |           |  |
|--|--|--|--|--|-----------|--|
|  |  |  |  |  | PNPLA8    |  |
|  |  |  |  |  | SOX13     |  |
|  |  |  |  |  | NCOA6IP   |  |
|  |  |  |  |  | PLXNA1    |  |
|  |  |  |  |  | TNFAIP8   |  |
|  |  |  |  |  | GABRB3    |  |
|  |  |  |  |  | RBM24     |  |
|  |  |  |  |  | DUSP1     |  |
|  |  |  |  |  | AR        |  |
|  |  |  |  |  | TNFRSF10B |  |
|  |  |  |  |  | REPS2     |  |
|  |  |  |  |  | PPFIBP2   |  |
|  |  |  |  |  | LOC643896 |  |
|  |  |  |  |  | MED23     |  |
|  |  |  |  |  | TUBB2A    |  |
|  |  |  |  |  | ALAD      |  |
|  |  |  |  |  | TEF       |  |
|  |  |  |  |  | EHF       |  |
|  |  |  |  |  | MTE       |  |
|  |  |  |  |  | LRRFIP2   |  |
|  |  |  |  |  | DNM1L     |  |
|  |  |  |  |  | GRHL2     |  |
|  |  |  |  |  | SFXN2     |  |
|  |  |  |  |  | RER1      |  |
|  |  |  |  |  | ZC3HAV1   |  |
|  |  |  |  |  | SDC1      |  |
|  |  |  |  |  | ZNF622    |  |
|  |  |  |  |  | FOXD4     |  |
|  |  |  |  |  | GOLSYN    |  |
|  |  |  |  |  | FNBP1L    |  |
|  |  |  |  |  | MAP3K6    |  |
|  |  |  |  |  | OSR2      |  |

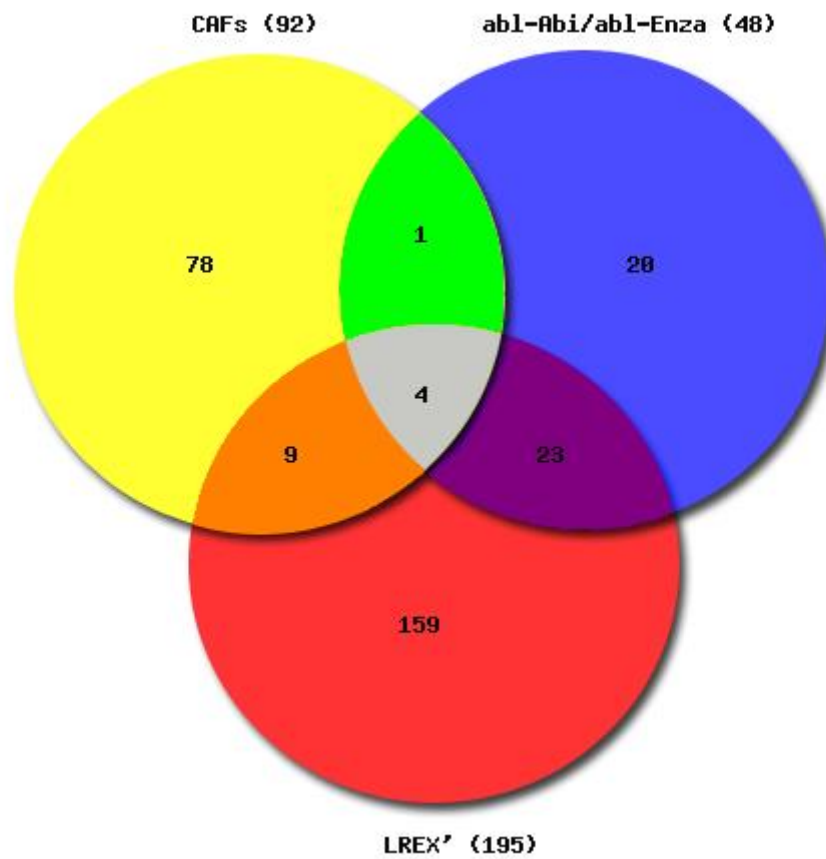

|     |                                              |
|-----|----------------------------------------------|
| 4   | mutual genes CAF, LNCaPabl-Abi/Enza, LREX'   |
| 23  | mutual genes , LNCaPabl-Abi/Enza, LREX'      |
| 1   | mutual genes , CAF, LNCaPabl-Abi/Enza, LREX' |
| 78  | genes CAF                                    |
| 20  | genes LNCaPabl-Abi/Enza                      |
| 159 | genes LREX'                                  |
| 9   | mutual genes CAF, LREX'                      |
