# Supplementary material for: Targeting the glucocorticoid receptor signature gene Mono Amine Oxidase-A enhances the efficacy of chemo- and anti-androgen therapy in advanced prostate cancer
Source: PubMed Central journal article supplement (PMC8084733; doi:10.1038/s41388-021-01754-0), 2021-04-01
Supplement: 41388_2021_1754_MOESM12_ESM.pdf [file 41388_2021_1754_MOESM12_ESM.pdf]

### Additional File 3 Table S2

Characteristics and descriptive histology at time of RPE of all included patients in the project.

| <b>patients included within the study</b><br>(patients characteristics and descriptive histology at time of RPE) |                |                                |              |
|------------------------------------------------------------------------------------------------------------------|----------------|--------------------------------|--------------|
| <b>patients in total (n=202)</b>                                                                                 |                |                                |              |
|                                                                                                                  | <b>mean</b>    | <b>median</b>                  | <b>range</b> |
| age (202/202)                                                                                                    | 62             | 62                             | 41-82        |
| PSA (ng/ml) (189/202)                                                                                            | 5.93           | 4.57                           | 1.35-54.7    |
| free PSA% (159/202)                                                                                              | 14.96          | 13.3                           | 3.1-34.7     |
| prostate weight (g) (191/202)                                                                                    | 40.8           | 40                             | 18-85        |
| <b>GS at time of RPE (192/202)</b>                                                                               |                |                                |              |
|                                                                                                                  | <b>numbers</b> | <b>% in total</b>              |              |
| GS 5–6                                                                                                           | 57             | 30                             |              |
| GS 7                                                                                                             | 94             | 49                             |              |
| GS 8–10                                                                                                          | 41             | 21                             |              |
| <b>pT-stage at time of RPE (192/202)</b>                                                                         |                |                                |              |
|                                                                                                                  | <b>numbers</b> | <b>% in total</b>              |              |
| pT2a                                                                                                             | 14             | 7                              |              |
| pT2b                                                                                                             | 2              | 1                              |              |
| pT2c                                                                                                             | 107            | 55                             |              |
| pT3a                                                                                                             | 50             | 26                             |              |
| pT3b                                                                                                             | 15             | 8                              |              |
| pT4                                                                                                              | 4              | 2                              |              |
| <b>biochemical tumor relapse</b>                                                                                 |                |                                |              |
|                                                                                                                  | <b>no</b>      | <b>yes</b>                     |              |
| patients (202/202)                                                                                               | 131            | 71                             |              |
| time to relapse (months) (71/202)                                                                                | ---            | 40 (mean)<br>1.6-126.9 (range) |              |
| <b>tumor specific treatment before RPE</b>                                                                       |                |                                |              |
|                                                                                                                  | <b>no</b>      | <b>yes</b>                     |              |
| patients (202/202)                                                                                               | 202            | 0                              |              |

**Additional File 3 Table S3**

Characteristics and descriptive histology at time of RPE of included relapse patients.

| <b>included relapse patients in total (n=65)</b><br><b>(patients characteristics and descriptive histology at time of RPE)</b> |                |                              |                          |
|--------------------------------------------------------------------------------------------------------------------------------|----------------|------------------------------|--------------------------|
| <b>group 1 patients (n=34)</b><br><b>(patients with low-intermediate MAO-A IRS)</b>                                            |                |                              |                          |
|                                                                                                                                | <b>mean</b>    | <b>median</b>                | <b>range</b>             |
| age (34/34)                                                                                                                    | 64             | 64                           | 51-74                    |
| PSA (ng/ml) (34/34)                                                                                                            | 7.3            | 5.5                          | 1.9-32.0                 |
| free PSA% (30/34)                                                                                                              | 14.5           | 13.3                         | 5.4-34.1                 |
| <b>GS at time of RPE (34/34)</b>                                                                                               |                |                              |                          |
|                                                                                                                                | <b>numbers</b> | <b>% in sub-group (n=34)</b> | <b>% in total (n=65)</b> |
| GS 5–6                                                                                                                         | 1              | 3                            | 2                        |
| GS 7                                                                                                                           | 21             | 62                           | 32                       |
| GS 8–10                                                                                                                        | 12             | 35                           | 18                       |
| <b>pT-stage at time of RPE (34/34)</b>                                                                                         |                |                              |                          |
|                                                                                                                                | <b>numbers</b> | <b>% in sub-group (n=34)</b> | <b>% in total (n=65)</b> |
| pT2a                                                                                                                           | 2              | 6                            | 3                        |
| pT2b                                                                                                                           | 2              | 6                            | 3                        |
| pT2c                                                                                                                           | 11             | 32                           | 17                       |
| pT3a                                                                                                                           | 16             | 47                           | 25                       |
| pT3b                                                                                                                           | 3              | 9                            | 5                        |
| pT4                                                                                                                            | 0              | 0                            | 0                        |
| <b>group 2 patients (n=31)</b><br><b>(patients with strong MAO-A IRS)</b>                                                      |                |                              |                          |
|                                                                                                                                | <b>mean</b>    | <b>median</b>                | <b>range</b>             |
| age (31/31)                                                                                                                    | 63             | 64                           | 41-76                    |
| PSA (ng/ml) (31/31)                                                                                                            | 7.0            | 5.0                          | 1.9-17.2                 |
| free PSA% (27/31)                                                                                                              | 17.5           | 15.5                         | 6.8-37.3                 |
| <b>GS at time of RPE (31/31)</b>                                                                                               |                |                              |                          |
|                                                                                                                                | <b>numbers</b> | <b>% in sub-group (n=31)</b> | <b>% in total (n=65)</b> |
| GS 5–6                                                                                                                         | 2              | 6                            | 3                        |
| GS 7                                                                                                                           | 14             | 45                           | 22                       |
| GS 8–10                                                                                                                        | 15             | 48                           | 23                       |
| <b>pT-stage at time of RPE (31/31)</b>                                                                                         |                |                              |                          |
|                                                                                                                                | <b>numbers</b> | <b>% in sub-group (n=31)</b> | <b>% in total (n=65)</b> |
| pT2a                                                                                                                           | 2              | 6                            | 3                        |
| pT2b                                                                                                                           | 0              | 0                            | 0                        |
| pT2c                                                                                                                           | 7              | 23                           | 11                       |
| pT3a                                                                                                                           | 12             | 39                           | 18                       |
| pT3b                                                                                                                           | 8              | 26                           | 12                       |
| pT4                                                                                                                            | 2              | 6                            | 3                        |
